## **Systemic immune dysfunction in cancer patients driven by IL6 and IL8 induction of an inhibitory receptor module in peripheral CD8<sup>+</sup> T cells**

**Ashwin Somasundaram<sup>1,2,3</sup>, Anthony R. Cillo<sup>1,2</sup>, Caleb Lampenfeld<sup>1,2</sup>, Lauren Oliveri<sup>3</sup>,  
Maria A. Velez<sup>3</sup>, Sonali Joyce<sup>3</sup>, Michael J. Calderon<sup>6</sup>, Rebekah Dadey<sup>1,2</sup>, Dhivyaa  
Rajasundaram<sup>7</sup>, Daniel P. Normolle<sup>4</sup>, Simon C. Watkins<sup>6</sup>, James G. Herman<sup>3</sup>, John M.  
Kirkwood<sup>3,8</sup>, Evan J. Lipson<sup>9</sup>, Robert L. Ferris<sup>2,5,8</sup>, Tullia C. Bruno<sup>1,2,8,10</sup> \*, Dario A.A.  
Vignali<sup>1,2,8,10\*</sup>**

<sup>1</sup> Department of Immunology, University of Pittsburgh School of Medicine, Pittsburgh, PA.

<sup>2</sup> Tumor Microenvironment Center, UPMC Hillman Cancer Center, Pittsburgh PA.

<sup>3</sup> Department of Medicine, Division of Hematology/Oncology, University of Pittsburgh School of Medicine, Pittsburgh PA.

<sup>4</sup> Department of Biostatistics, University of Pittsburgh School of Public Health, Pittsburgh PA.

<sup>5</sup> Department of Otolaryngology, University of Pittsburgh School of Medicine, Pittsburgh, PA.

<sup>6</sup> Department of Cell Biology, University of Pittsburgh School of Medicine, Pittsburgh, PA.

<sup>7</sup> Department of Pediatrics, University of Pittsburgh School of Medicine, Pittsburgh, PA.

<sup>8</sup> Cancer Immunology and Immunotherapy Program, UPMC Hillman Cancer Center, Pittsburgh, PA, USA.

<sup>9</sup> Department of Oncology, Sidney Kimmel Comprehensive Cancer Center, and Bloomberg-Kimmel Institute for Cancer Immunotherapy, Johns Hopkins University School of Medicine, Baltimore, MD, USA.

<sup>10</sup> These authors jointly supervised this work: Tullia C. Bruno, Dario AA Vignali

\* e-mail: [dvignali@pitt.edu](mailto:dvignali@pitt.edu); [tbruno@pitt.edu](mailto:tbruno@pitt.edu)

1 **Many cancer patients do not develop a durable response to the current standard of care**  
2 **immunotherapies despite substantial advances in targeting immune inhibitory receptors<sup>1-</sup>**  
3 **<sup>5</sup>. A potential compounding issue, which may serve as an unappreciated, dominant**  
4 **resistance mechanism, is an inherent systemic immune dysfunction that is often**  
5 **associated with advanced cancer<sup>6-12</sup>. Minimal response to inhibitory receptor (IR) blockade**  
6 **therapy and increased disease burden have been associated with peripheral CD8<sup>+</sup> T cell**  
7 **dysfunction, characterized by suboptimal T cell proliferation and chronic expression of**  
8 **IRs (eg. Programmed Death 1 [PD1] and Lymphocyte Activation Gene 3 [LAG3])<sup>13,14</sup>. Here,**  
9 **we demonstrate that up to a third of cancer patients express robust intracellular LAG3**  
10 **(LAG3<sup>IC</sup>), but not surface LAG3 (LAG3<sup>SUR</sup>), in peripheral CD8<sup>+</sup> T cells compared to CD4<sup>+</sup> T**  
11 **cells and regulatory T cells (T<sub>regs</sub>). LAG3<sup>IC</sup> is associated with: (i) expression of a LAG3<sup>IC</sup>-**  
12 **dominant IR module that includes PD1<sup>IC</sup>, NRP1<sup>IC</sup>, CD39<sup>IC</sup>, and TIGIT<sup>IC</sup>; (ii) decreased CD8<sup>+</sup>**  
13 **but not CD4<sup>+</sup> T cell function that can be reversed by anti-LAG3 (and/or anti-PD1), despite**  
14 **limited constitutive surface IR expression; and (iii) poor disease prognosis. Systemic**  
15 **immune dysfunction is restricted to CD8<sup>+</sup> T cells, including a high percentage of peripheral**  
16 **naïve CD8<sup>+</sup> T cells, indicating a TCR-independent mechanism that is driven by the cytokine**  
17 **IL6 and the chemokine IL8. Thus, the combination of an increased LAG3-dominant IR**  
18 **module and elevated systemic IL6 and/or IL8 may serve as predictive biomarkers and**  
19 **increase the possibility that cancer patients will benefit from therapeutic combinations**  
20 **targeting these systemic cytokines in the setting of PD1 and/or LAG3 blockade.**

21 PD1/PDL1 blockade has revolutionized therapeutic options for solid tumors<sup>1,3-5,15,16</sup>,  
22 however, only 20-30% of patients will respond to PD1 blockade, emphasizing the need to identify  
23 underlying mechanisms of immune resistance<sup>17</sup>. Another important and often underappreciated  
24 fact is that many cancer patients have reactivation of chronic viral infections, lose their response  
25 to vaccinations and succumb to secondary infections without tumor progression<sup>7-12</sup>. Expression

26 of additional inhibitory receptors (IRs) on peripheral immune cells has been associated with  
27 immune resistance across multiple tumor types<sup>13,18,19</sup>. The extent to which these observations  
28 underlie a dominant mechanism of immune resistance to immunotherapy and whether this is  
29 connected to general immune dysfunction in cancer patients remains unknown. LAG3 is an IR  
30 that has been associated with a dysfunctional CD8<sup>+</sup> T cell phenotype in the periphery of mouse  
31 models of cancer and metastatic melanoma patients<sup>13,18-21</sup>. Although surface LAG3 (LAG3<sup>SUR</sup>)  
32 expression on peripheral blood T cells can be limited, we speculated that LAG3 expression may  
33 be more impactful than previously appreciated due to: (i) rapid cell surface shedding of LAG3 via  
34 the metalloproteases ADAM10 and ADAM17, and (ii) prevalent intracellular LAG3 storage in T  
35 cells<sup>22-25</sup>. Thus, we evaluated the dynamics of surface and intracellular LAG3 expression, the  
36 expression of other IRs, and the potential systemic factors that might drive systemic immune  
37 dysfunction in cancer.

38 We initially analyzed single-cell RNA sequencing (scRNAseq) data from 26 HNSCC  
39 patient peripheral blood leukocytes (PBL) and 6 healthy donors (HD) PBL (**Fig. 1a**)<sup>26</sup>.  
40 Interestingly, *LAG3* was expressed in a high percentage of T cells and appeared to be largely  
41 restricted to HNSCC patient CD8<sup>+</sup> T cells over other cell populations, including patient CD4<sup>+</sup> T  
42 effector cells and T<sub>regs</sub>, and HD CD8<sup>+</sup> T cells (**Fig. 1a, Extended Data Fig. 1a**). A similar pattern  
43 of expression has also been reported in NSCLC patients<sup>27</sup>. Further analysis suggested that  
44 *PDCD1* (encoding PD1) exhibited a similar expression pattern, albeit to a lesser extent. These  
45 transcriptomic data suggest that *LAG3* and *PDCD1* are expressed at increased levels in  
46 peripheral CD8<sup>+</sup> T cells of some cancer patients, an observation that had not previously been  
47 appreciated (**Fig. 1a, Extended Data Fig. 1a-c**).

48 Despite increased transcription, LAG3<sup>SUR</sup> expression on patient peripheral T cells by flow  
49 cytometric analysis was minimal across all immune cell subpopulations compared to CD8<sup>+</sup> T cells  
50 (**Fig. 1b-e**). Our previous studies with mouse T cells suggest that a substantial amount of LAG3

51 can be stored intracellularly, awaiting rapid trafficking to the cell surface following TCR  
52 stimulation<sup>23</sup>. Intracellular, but not surface, LAG3 has been reported as elevated in cancer patient  
53 peripheral blood T cells compared to healthy donors<sup>25</sup>. Using two non-competing antibodies, we  
54 analyzed LAG3<sup>SUR</sup> and intracellular LAG3 (LAG3<sup>IC</sup>; determined by subtracting LAG3<sup>SUR</sup> from  
55 LAG3<sup>TOT</sup>) by multi-parameter flow cytometry and by stimulated emission depletion (STED)  
56 microscopy (**Fig. 1b, c**). Approximately 30% of patients with HNSCC, NSCLC, and metastatic  
57 melanoma exhibited a striking bimodal distribution of LAG3<sup>TOT</sup> and LAG3<sup>IC</sup> protein expression;  
58 'high' LAG3<sup>TOT</sup>/LAG3<sup>IC</sup> defined as 49-100% expression and 'low' LAG3<sup>TOT</sup>/LAG3<sup>IC</sup> defined as 0-  
59 49% expression. (**Fig. 1d, e**). This was a unique feature of CD8<sup>+</sup> T cells as this was not observed  
60 with other patient T cell populations (eg. CD4<sup>+</sup>Foxp3<sup>-</sup> T cells and T<sub>regs</sub>) and HD T cells. While  
61 these findings were observed in the peripheral blood, high LAG3<sup>IC</sup> expression on matched tumor-  
62 infiltrating lymphocytes (TIL) also had a positive correlation with high LAG3<sup>IC</sup> expression in  
63 peripheral CD8<sup>+</sup> T cells, suggesting that these systemic findings may inform the state of the tumor  
64 microenvironment (**Fig. 1f, g**). Interestingly, patients with high LAG3<sup>IC</sup> in their peripheral CD8<sup>+</sup> T  
65 cells also exhibited co-expression of other IRs, notably PD1<sup>IC</sup>, NRP1<sup>IC</sup>, CD39<sup>IC</sup>, and TIGIT<sup>IC</sup> (**Fig.**  
66 **1h, Extended Data Fig. 1d, e, 2**), ultimately creating a LAG3-dominant module of IR expression.

67 To further evaluate the state of chromatin modeling at the site of these IR genes, genes  
68 of T cell naivety, and genes of T cell activation<sup>28</sup>, we performed ATAC-seq on CD8<sup>+</sup> T cells from  
69 NSCLC PBL from both patients with low and high LAG3<sup>IC</sup>-dominant IR expression and found that  
70 relative to areas of known closed chromatin as a negative control, the IR associated areas of  
71 chromatin were open (**Extended Data Fig. 3**). However, there were no differences in chromatin  
72 accessibility between the low vs. high LAG3<sup>+</sup> CD8<sup>+</sup> T cells, suggesting that regulation of  
73 expression may happen downstream of chromatin remodeling.

74 A blinded, retrospective analysis of 50 HNSCC patient PBL samples indicated worse  
75 disease burden i.e. recurrent/metastatic disease (R/M), and worse overall survival in patients with

76 high LAG3<sup>IC</sup> in their peripheral CD8<sup>+</sup> T cells (**Fig. 1i, j, Supplementary Table 1**). Taken together,  
77 these data suggest that a LAG3-dominant IR module in systemic CD8<sup>+</sup> T cells may contribute to  
78 a reduction of productive immunity in cancer patients. Further, these data also suggest that  
79 systemic IR expression should be considered as a biomarker of increased disease burden.

80 To better interrogate if LAG3<sup>IC</sup> may also predict response to immunotherapy, we evaluated  
81 a cohort of 37 patients with skin cancer malignancies that received standard of care  
82 immunotherapies (**Supplementary Table 2**). Interestingly, we found that LAG3<sup>IC</sup> was increased  
83 more significantly in the Ki-67<sup>low</sup> CD8<sup>+</sup> T cells in the post timepoints of progressors vs. responders,  
84 ultimately suggesting that this might serve as a biomarker for immunotherapeutic resistance (**Fig.**  
85 **1k, Extended Data Fig. 4**).

86 We next interrogated LAG3 kinetics as intracellular storage of LAG3 does not allow it to  
87 engage with its ligand, ultimately leading to two key questions: (a) does LAG3<sup>IC</sup> shuttle to the cell  
88 surface, and (b) does LAG3<sup>IC</sup> have a functional consequence on CD8<sup>+</sup> T cells? LAG3 function is  
89 dependent on cell surface expression and ligand interaction<sup>20</sup>, however, the majority of our  
90 findings have been intracellular LAG3. We first expanded our STED experiments to evaluate  
91 intracellular localization of LAG3 expression via co-expression with key intracellular trafficking  
92 proteins (Cathepsin D, LAMP2, Rab27a, Rab5a, Rab11a, EEA1). These data suggested that  
93 intracellular LAG3 co-localizes with vesicles containing Cathepsin D and/or Early endosome  
94 antigen 1 (EEA1), which raises the possibility that LAG3 is cycling via endosomes (**Extended**  
95 **Data Fig. 5**)<sup>29-33</sup>. While this finding confirms intracellular compartmentalization, it doesn't provide  
96 sufficient insight into the surface trafficking of the protein. Thus, we first evaluated LAG3<sup>SUR</sup>  
97 expression over time on stimulated CD8<sup>+</sup> T cells from NSCLC patients with high and low LAG3<sup>IC</sup>  
98 compared to HD. We found that CD8<sup>+</sup> T cells from patients with high LAG3<sup>IC</sup> had higher LAG3<sup>SUR</sup>  
99 expression at 24h and 48h following *in vitro* TCR stimulation compared to patients with low LAG3<sup>IC</sup>  
100 or HD (**Fig. 2a**). We also found that LAG3<sup>IC</sup> and LAG3<sup>TOT</sup> expression in CD8<sup>+</sup> T cells strongly

101 correlated with soluble LAG3 (sLAG3) release into the media after a 24h *in vitro* culture with TCR  
102 stimulation (co-culture with plate-bound anti-CD3 and anti-CD28) (**Fig. 2b**). This suggests that  
103 LAG3 is not simply retained intracellularly, but rather, is dynamically translocated to the cell  
104 surface to be subsequently shed.

105 We hypothesized that the presence of LAG3<sup>IC</sup> and the absence of LAG3<sup>SUR</sup> may be due  
106 to constitutive shedding by ADAM family metalloproteinases with the release of sLAG3<sup>22</sup>.  
107 Consistent with this hypothesis, we found that most peripheral CD8<sup>+</sup> T cells exhibited an inverse  
108 correlation between LAG3<sup>SUR</sup> and ADAM10, but not ADAM17, surface expression with the  
109 predominant pattern being low LAG3<sup>SUR</sup> and high ADAM10 expression in the CD8<sup>+</sup> T cells (**Fig.**  
110 **2c, d**)<sup>22</sup>. Indeed, LAG3<sup>SUR</sup> expression increased and sLAG3 in media decreased after *in vitro*  
111 treatment with an ADAM10 inhibitor (**Fig. 2e, f**). These data imply that LAG3 does reach the cell  
112 surface but is rapidly shed by ADAM10 explaining the lack of detectable cell surface expression  
113 by flow cytometry. Thus, LAG3 protein trafficking to the cell surface does occur in the presence  
114 of TCR stimulation, but only for a limited time before being shed by ADAM10. These data suggest  
115 that LAG3<sup>IC</sup> could have a functional consequence in peripheral CD8<sup>+</sup> T cells from patients with  
116 cancer.

117 We interrogated the functional consequence of high LAG3<sup>IC</sup> expression on peripheral  
118 CD8<sup>+</sup> T cells in a cohort of NSCLC patient samples. CD8<sup>+</sup> T cells from patients with high LAG3<sup>IC</sup>  
119 expression demonstrated decreased cytokine production (TNF $\alpha$ , IL2, IFN $\gamma$ ) upon stimulation with  
120 PMA and ionomycin compared to CD8<sup>+</sup> T cells from patients with low LAG3<sup>IC</sup> expression or HD,  
121 consistent with reported findings in murine models (**Fig. 3a, b**)<sup>34</sup>. CD8<sup>+</sup> T cells with high LAG3<sup>IC</sup>  
122 from patients with either NSCLC or metastatic melanoma also exhibited reduced T cell  
123 proliferation (**Fig. 3c, d**). Strikingly, CD8<sup>+</sup> T cell proliferation could be restored with the addition of  
124 either anti-PD1, anti-LAG3, or the combination (**Fig. 3e-g**). Taken together, despite minimal  
125 detectable LAG3<sup>SUR</sup> expression by flow cytometry due to rapid ADAM-mediated shedding (**Fig.**

126 **2a-c)**, IR blockade can still reverse T cell dysfunction *in vitro*. These data raise the possibility that  
127 IR blockade may not only reverse intratumoral T cell dysfunction but may also relieve systemic T  
128 cell immune dysfunction despite rapid shedding of LAG3 from the surface of CD8<sup>+</sup> T cells.

129 One of the most surprising aspects of these data is that in some patients essentially all  
130 their peripheral CD8<sup>+</sup> T cells display high expression of this IR module, exemplified by LAG3<sup>IC</sup>  
131 expression. Extensive immunophenotyping of patient peripheral CD8<sup>+</sup> T cells revealed that this  
132 LAG3-dominant IR module was also expressed by naïve CD8<sup>+</sup> T cells along with other T cell  
133 subsets, such as effector memory CD8<sup>+</sup> T cells and terminally differentiated (T<sub>EMRA</sub>) CD8<sup>+</sup> T cells  
134 (**Extended Data Fig. 6a, b**)<sup>35</sup>. One immediate conclusion is that these CD8<sup>+</sup> T cells are not bona  
135 fide naïve CD8<sup>+</sup> T cells, and perhaps have endured an activation or proliferation event while still  
136 exhibiting a canonical naïve T cell phenotype (CD45RA<sup>+</sup>, CCR7<sup>+</sup>, CD62L<sup>+</sup>, CD127<sup>+</sup>, CD95<sup>-</sup>,  
137 CD69<sup>-</sup>, HLA-DR<sup>-</sup>)<sup>36</sup>. We utilized analysis of T cell receptor excision circles (TREC) to evaluate  
138 their ‘proliferative history’ and state of naivety. During TCR rearrangement, TREC is generated  
139 and their prevalence among T cells has been used as a marker of their naïve status and lack of  
140 TCR-driven proliferation<sup>37-40</sup>. TREC concentrations were similar between purified naïve CD8<sup>+</sup> T  
141 cells from patients with or without an elevated LAG3-dominant IR module and purified naïve HD  
142 CD8<sup>+</sup> T cells (**Extended Data Fig. 6c**). These data suggest that patients with high LAG3<sup>IC</sup>  
143 expression in their naïve CD8<sup>+</sup> T cells are not expressing the LAG3-dominant IR module due to  
144 a proliferative event that might otherwise induce IR expression<sup>37</sup>. We also queried the functional  
145 consequence of the LAG3-dominant IR module concerning naïve CD8<sup>+</sup> T cell function and found  
146 that cytokine production and proliferation were also affected in this subset and this T cell  
147 dysfunction could be rescued with checkpoint blockade (**Extended Data Fig. 7a-d**). Taken  
148 together, these data suggest that a cell-extrinsic stimulus is driving the expression of a LAG3-  
149 dominant IR module on bona fide naïve CD8<sup>+</sup> T cells that would presumably not have been  
150 exposed to a cognate TCR stimulation or activation event.

151           Given the influx of inflammatory factors into the blood of cancer patients, we first asked if  
152 systemic cytokines in plasma could provide an extrinsic stimulus driving IR expression in naïve  
153 CD8<sup>+</sup> T cells. Remarkably, we found that plasma from NSCLC patients with high LAG3<sup>IC</sup>, but not  
154 NSCLC patients with low LAG3<sup>IC</sup> or heavy smoker ‘healthy’ control patients, could induce LAG3<sup>IC</sup>  
155 and PD1<sup>IC</sup> expression in HD naïve CD8<sup>+</sup> T cells without TCR stimulation (**Fig 4a, b**). We further  
156 corroborated these data with plasma from patients with metastatic melanoma or HNSCC who  
157 expressed high vs. low LAG3<sup>IC</sup> (**Extended Data Fig. 8a, b**) for an array of cytokines while  
158 simultaneously testing if recombinant versions of these cytokines could induce LAG3<sup>IC</sup> and PD1<sup>IC</sup>  
159 in HD CD8<sup>+</sup> T cells. Interestingly, six cytokines were both elevated in patient plasma and could  
160 induce LAG3<sup>IC</sup> and PD1<sup>IC</sup> in naïve CD8<sup>+</sup> T cells in the absence of TCR stimulation: IL6, IL8, IL9,  
161 IL10, IL15 and IL21 (**Fig. 4c, Extended Data Fig. 8c-e, Supplementary Table 3**). Further, all of  
162 these cytokines had a statistically significant correlation with LAG3<sup>IC</sup> and PD1<sup>IC</sup> expression in  
163 CD8<sup>+</sup> T cells (**Fig. 4c, Supplementary Table 3**). We further evaluated the induction of the other  
164 IRs in this module in the presence of IL6 and IL8 and noted a trend towards induction while not  
165 statistically significant (**Extended Data Fig. 8e**).

166           Next, we tested which of these six core cytokines were required to induce LAG3<sup>IC</sup> and  
167 PD1<sup>IC</sup> expression by assessing if neutralizing antibodies against these cytokines could block the  
168 ability of plasma from patients with high LAG3<sup>IC</sup> to induce LAG3<sup>IC</sup>/PD1<sup>IC</sup>. Blockade of IL6 or IL8,  
169 but not the other cytokines, limited LAG3<sup>IC</sup> and PD1<sup>IC</sup> expression on HD naïve CD8<sup>+</sup> T cells, with  
170 a clear additive effect with IL6/IL8 combinatorial blockade (**Fig. 4d, e, Extended Data Fig. 9a**).  
171 When plasma cytokine levels were elevated, LAG3<sup>IC</sup> was increased on the naïve CD8<sup>+</sup> T cells  
172 from NSCLC patients (**Fig. 4f**). We also evaluated the simultaneous effects of IL6 and IL8 with a  
173 titration of TCR stimulation as productive TCR engagement can also drive LAG3<sup>IC</sup> expression.  
174 IL6 and IL8 similarly induced LAG3<sup>IC</sup> expression, except for high-dose TCR stimulation (10 µg/ml),  
175 which leads to maximal expression of LAG3 (**Extended Data Fig. 9b**).



176 IL6 induces signal transduction via Signal Transducer and Activator of Transcription 3  
177 (STAT3). Interestingly, elevated pSTAT3, but not pSTAT1, was observed in naïve CD8<sup>+</sup> T cells,  
178 but not naïve CD4<sup>+</sup> T cells, in NSCLC patients with high, but not low, LAG3<sup>IC</sup> (**Fig 4g, h**). NSCLC  
179 patients with high LAG3<sup>IC</sup> in their CD8<sup>+</sup> T cells had lower IL6 receptor (IL6R) expression and IL8  
180 receptor (CXCR1) expression compared to CD8<sup>+</sup> T cells from patients with NSCLC and low  
181 LAG3<sup>IC</sup> expression (**Extended Data Fig. 9c**). Finally, evaluation of plasma IL6 from advanced  
182 NSCLC patients during standard-of-care PD1 blockade therapy revealed worse overall survival  
183 in patients with elevated plasma IL6 as previously described compared with patients with lower  
184 plasma IL6, and we observed a significant increase in the entire IR module when patients were  
185 high for systemic IL6 (**Fig 4i, Extended Data Fig. 9d**).

186 Taken together, these data suggest that IL6 and IL8 are elevated systemically in a subset  
187 of cancer patients and are the primary drivers of a LAG3-dominant IR module, exemplified by  
188 LAG3<sup>IC</sup> and PD1<sup>IC</sup>, on a large proportion of CD8<sup>+</sup> T cells that includes naïve T cells, but not CD4<sup>+</sup>  
189 T cells and T<sub>regs</sub>, leading to their dysfunction and poor clinical outcome in those patients (**Fig. 4j**).  
190 It has long been known that some cancer patients have systemic immune dysfunction and worse  
191 outcomes regardless of therapy<sup>7,41</sup>, but the mechanisms driving these observations were  
192 unknown. Our data suggest a novel and targetable mechanism to explain this finding that may  
193 also inform future clinical trial design. First, our study presents a cohort of biomarkers (LAG3-  
194 dominant IR module: LAG3<sup>IC</sup>, PD1<sup>IC</sup>, NRP1<sup>IC</sup>, CD39<sup>IC</sup> & TIGIT<sup>IC</sup> on a high percentage of peripheral  
195 CD8<sup>+</sup> T cells, and elevated IL6 and/or IL8 in plasma) that identify patients that have a poor cancer  
196 prognosis but may respond to combinatorial therapy that targets all, or a subset, of these  
197 biomarkers. Similar findings regarding IL6 induction of LAG3 and PD1 in tumor-infiltrating CD8<sup>+</sup> T  
198 cells in cancer patients has been reported<sup>42</sup>. Similar findings have been recently been reported  
199 for other patients with solid tumors, and combined IL6 and checkpoint blockade has shown  
200 promise in animal models<sup>43-47</sup>. Second, our observations highlight the necessity to fully evaluate

201 LAG3 expression (both intracellularly and on the cell surface) in cancer immunotherapy clinical  
202 trials. Monitoring patients for any early sign of primary resistance to immunotherapy using  
203 peripheral blood CD8<sup>+</sup> T cell signatures or by plasma cytokine concentrations would be both  
204 convenient and impactful for patients and clinicians as cancer patients can decline rapidly before  
205 reaching next-line therapy. Third, our findings highlight a mechanism that drives a high proportion  
206 of peripheral CD8<sup>+</sup> T cells (but not peripheral CD4<sup>+</sup> T cells), including naïve T cells, to exhibit  
207 profound immune dysfunction as a consequence of expression of an IL6/IL8-induced LAG3-  
208 dominant IR module. IL6 and IL8 have both been reported in association with systemic  
209 inflammation of malignancy and worse outcomes of disease<sup>48,49</sup>. Further prospective validation is  
210 necessary to establish if IL6/IL8 and LAG3<sup>IC</sup> are resistance mechanisms to cancer therapy,  
211 especially checkpoint blockade immunotherapies, adoptive CAR-T/TIL therapies, and vaccine  
212 strategies (prophylactic and therapeutic, oncolytic, etc.)<sup>6-9,41,50</sup>. It will also be important to  
213 determine if the expression of this LAG3-dominant IR module is directly responsible for limiting  
214 the capacity of patients with advanced cancer to ward off infections that might otherwise increase  
215 morbidity or limit responsiveness to vaccination, such as the annual influenza vaccine<sup>10-12,51</sup>.  
216 These findings would also impact the clinical evaluation of patients at risk for T cell dysfunction  
217 such as patients with chronic viral conditions or patients who suffer from severe autoimmunity<sup>52,53</sup>.  
218 Fourth, our findings of dysfunctional naïve CD8<sup>+</sup> T cells expressing IRs describes a new aspect  
219 of T cell biology that has not currently been appreciated and may be broadly applicable beyond  
220 cancer. Indeed, it has not escaped our notice that early observations in patients with COVID19  
221 that had a poor prognosis also exhibited elevated IL6 and IR expression, suggesting our findings  
222 may have general applicability in multiple disease settings<sup>52,54,55</sup>. These findings have promising  
223 implications for combinatorial immunotherapeutic approaches targeting these cytokines and IRs,  
224 such as PD1 and LAG3, and present a set of biomarkers that may inform cancer therapy  
225 approaches.

226

227 **Acknowledgments**

228 The authors wish to thank Jody Bonnevier at R&D Systems for providing our listed cytokines and  
229 functional antibodies. We also wish to thank BMS for providing staining and functional antibodies.  
230 The authors thank M. Meyer, B. Janjic, and A.D. Donnenberg from the HCC Flow Core and cell  
231 sorting, the Department of Cardiothoracic Surgery at the University of Pittsburgh, in particular,  
232 Ms. Julie Ward for her help in coordination and gathering patient consents, as well as the  
233 Department of Cardiothoracic Surgery at the University of Colorado and the University of  
234 Colorado SPORE for providing samples, the Department of Hematology/Oncology at the  
235 University of Pittsburgh for research support and patient samples including C. Sander and M.  
236 Serrano, the Department of Otolaryngology at the University of Pittsburgh for providing patient  
237 samples and clinical information. This work was supported by the National Institutes of Health  
238 (R01 CA203689 and P01 AI108545 to D.A.A.V.), NCI Comprehensive Cancer Center Support  
239 CORE grant (CA047904 to D.A.A.V.), HNSCC SPORE grant (P50 CA097190 to R.L.F. and  
240 D.A.A.V), Melanoma SPORE grant and developmental research project (P50 CA121973 to  
241 J.M.K.), UPP Department of Surgery Foundation grant (internal grant to T.C.B.), NCI Institutional  
242 National Research Service Award in Cancer Therapeutics (T32 CA193205-04 to E. Chu) and an  
243 Eden Hall pilot grant (internal grant to A.S. and D.A.A.V.). This project also used the Hillman  
244 Cancer Center Immunologic Monitoring and Cellular Products Laboratory that is supported in part  
245 by award P30 CA047904.

246

247 **AUTHOR CONTRIBUTIONS**

248 D.A.A.V and T.C.B. conceived and directed the project; D.A.A.V obtained funding for the project;  
249 A.S., T.C.B., and D.A.A.V conceptualized, designed, analyzed the experiments and wrote the  
250 manuscript; A.S. performed the experiments with help from A.R.C. for the single-cell RNAseq

*Somasundaram et al.*

*IL6/IL8 drive systemic immune dysfunction*

251 experiments and analyses; C. L, L.O., and M.V. obtained and processed multiple fresh and frozen  
252 samples from our patient cohorts; S.J. performed the qPCR for the TREC experiments; M.J.C.  
253 and S.C.W. performed and analyzed our STED microscopy; D.P.N performed the statistical  
254 analyses for our experiments; E.J.L., J.G.H, J.M.K, and R.L.F. obtained HD smoker control  
255 samples, NSCLC, metastatic melanoma, and HNSCC specimens and cohorts. All authors  
256 provided feedback and approved the manuscript.

257

## 258 **AUTHOR INFORMATION**

259 The authors declare competing financial interests. D.A.A.V has submitted patents covering LAG3  
260 and NRP1 that are licensed or pending and is entitled to a share in net income generated from  
261 licensing of these patent rights for commercial development. R.L.F. is on the advisory board  
262 and receives clinical trial and research funding from Bristol-Myers Squibb. E.L. is a consultant  
263 and receives research funding from Bristol-Myers Squibb.

## REFERENCES

- 1 Topalian, S. L. *et al.* Safety, activity, and immune correlates of anti-PD-1 antibody in cancer. *The New England journal of medicine* **366**, 2443-2454 (2012).
- 2 Paz-Ares, L. *et al.* Pembrolizumab plus Chemotherapy for Squamous Non-Small-Cell Lung Cancer. *The New England journal of medicine* **379**, 2040-2051 (2018).
- 3 Gandhi, L. *et al.* Pembrolizumab plus Chemotherapy in Metastatic Non-Small-Cell Lung Cancer. *N Engl J Med* **378**, 2078-2092 (2018).
- 4 Ferris, R. L. *et al.* Nivolumab for Recurrent Squamous-Cell Carcinoma of the Head and Neck. *The New England journal of medicine* **375**, 1856-1867 (2016).
- 5 Topalian, S. L. *et al.* Survival, durable tumor remission, and long-term safety in patients with advanced melanoma receiving nivolumab. *Journal of clinical oncology : official journal of the American Society of Clinical Oncology* **32**, 1020-1030 (2014).
- 6 Pardoll, D. M. The blockade of immune checkpoints in cancer immunotherapy. *Nature Reviews Cancer* **12**, 252-264 (2012).
- 7 Rolston, K. V. Infections in Cancer Patients with Solid Tumors: A Review. *Infectious diseases and therapy* **6**, 69-83 (2017).
- 8 Gudiol, C., Aguado, J. M. & Carratala, J. Bloodstream infections in patients with solid tumors. *Virulence* **7**, 298-308 (2016).
- 9 Mahale, P. *et al.* Acute exacerbation and reactivation of chronic hepatitis C virus infection in cancer patients. *Journal of hepatology* **57**, 1177-1185 (2012).
- 10 Cox, M. A., Nechanitzky, R. & Mak, T. W. Check point inhibitors as therapies for infectious diseases. *Curr Opin Immunol* **48**, 61-67 (2017).
- 11 Dyck, L. & Mills, K. H. Immune checkpoints and their inhibition in cancer and infectious diseases. *Eur J Immunol* **47**, 765-779 (2017).

- 12 Picchi, H. *et al.* Infectious complications associated with the use of immune checkpoint inhibitors in oncology: reactivation of tuberculosis after anti PD-1 treatment. *Clin Microbiol Infect* **24**, 216-218 (2018).
- 13 Huang, A. C. *et al.* T-cell invigoration to tumour burden ratio associated with anti-PD-1 response. *Nature* **545**, 60-65, doi:10.1038/nature22079 (2017).
- 14 Huang, A. C. *et al.* A single dose of neoadjuvant PD-1 blockade predicts clinical outcomes in resectable melanoma. *Nature medicine* **25**, 454-461, doi:10.1038/s41591-019-0357-y (2019).
- 15 Paz-Ares, L. *et al.* Pembrolizumab plus chemotherapy for squamous non–small-cell lung cancer. *The New England journal of medicine* (2018).
- 16 Ferris, R. L. *et al.* Two-year Update From CheckMate 141: Outcomes With Nivolumab (Nivo) vs Investigator's Choice (IC) in Recurrent or Metastatic (R/M) Squamous Cell Carcinoma of the Head and Neck (SCCHN) in the Overall Population and PD-L1 Subgroups. *International Journal of Radiation Oncology • Biology • Physics* **100**, 1317 (2018).
- 17 Sharma, P., Hu-Lieskovan, S., Wargo, J. A. & Ribas, A. Primary, Adaptive, and Acquired Resistance to Cancer Immunotherapy. *Cell* **168**, 707-723 (2017).
- 18 Riaz, N. *et al.* Tumor and Microenvironment Evolution during Immunotherapy with Nivolumab. *Cell* **171**, 934-949.e916 (2017).
- 19 Woo, S. R. *et al.* Immune inhibitory molecules LAG-3 and PD-1 synergistically regulate T-cell function to promote tumoral immune escape. *Cancer research* **72**, 917-927 (2012).
- 20 Andrews, L. P., Marciscano, A. E., Drake, C. G. & Vignali, D. A. LAG3 (CD223) as a cancer immunotherapy target. *Immunological reviews* **276**, 80-96 (2017).
- 21 Blackburn, S. D. *et al.* Coregulation of CD8+ T cell exhaustion by multiple inhibitory receptors during chronic viral infection. *Nat Immunol* **10**, 29 (2008).

- 22 Li, N. *et al.* Metalloproteases regulate T-cell proliferation and effector function via LAG-3. *The EMBO journal* **26**, 494-504 (2007).
- 23 Woo, S.-R. *et al.* Differential subcellular localization of the regulatory T-cell protein LAG-3 and the coreceptor CD4. *Eur J Immunol* **40**, 1768-1777 (2010).
- 24 Bae, J., Lee, S. J., Park, C. G., Lee, Y. S. & Chun, T. Trafficking of LAG-3 to the surface on activated T cells via its cytoplasmic domain and protein kinase C signaling. *J Immunol.* **193**, 3101-3112 (2014).
- 25 Choi, J. *et al.* Diagnostic value of peripheral blood immune profiling in colorectal cancer. *Annals of surgical treatment and research* **94**, 312-321 (2018).
- 26 Cillo, A. R. *et al.* Immune Landscape of Viral- and Carcinogen-Driven Head and Neck Cancer. *Immunity* **52**, 183-199.e189, doi:10.1016/j.immuni.2019.11.014 (2020).
- 27 Datar, I. *et al.* Expression Analysis and Significance of PD-1, LAG-3, and TIM-3 in Human Non-Small Cell Lung Cancer Using Spatially Resolved and Multiparametric Single-Cell Analysis. *Clinical cancer research : an official journal of the American Association for Cancer Research* **25**, 4663-4673, doi:10.1158/1078-0432.Ccr-18-4142 (2019).
- 28 Rawlings, J. S., Gatzka, M., Thomas, P. G. & Ihle, J. N. Chromatin condensation via the condensin II complex is required for peripheral T-cell quiescence. *The EMBO journal* **30**, 263-276, doi:10.1038/emboj.2010.314 (2011).
- 29 Perisic Nanut, M., Sabotic, J., Jewett, A. & Kos, J. Cysteine cathepsins as regulators of the cytotoxicity of NK and T cells. *Frontiers in immunology* **5**, 616, doi:10.3389/fimmu.2014.00616 (2014).
- 30 Wilson, J. M. *et al.* EEA1, a tethering protein of the early sorting endosome, shows a polarized distribution in hippocampal neurons, epithelial cells, and fibroblasts. *Molecular biology of the cell* **11**, 2657-2671, doi:10.1091/mbc.11.8.2657 (2000).

- 31 Karlsson, K. & Carlsson, S. R. Sorting of lysosomal membrane glycoproteins lamp-1 and lamp-2 into vesicles distinct from mannose 6-phosphate receptor/gamma-adaptin vesicles at the trans-Golgi network. *The Journal of biological chemistry* **273**, 18966-18973, doi:10.1074/jbc.273.30.18966 (1998).
- 32 Ostrowski, M. *et al.* Rab27a and Rab27b control different steps of the exosome secretion pathway. *Nature cell biology* **12**, 19-30; sup pp 11-13, doi:10.1038/ncb2000 (2010).
- 33 Takahashi, S. *et al.* Rab11 regulates exocytosis of recycling vesicles at the plasma membrane. *Journal of cell science* **125**, 4049-4057, doi:10.1242/jcs.102913 (2012).
- 34 Grosso, J. F. *et al.* LAG-3 regulates CD8+ T cell accumulation and effector function in murine self- and tumor-tolerance systems. *The Journal of clinical investigation* **117**, 3383-3392, doi:10.1172/jci31184 (2007).
- 35 Kumar, B. V. *et al.* Human tissue-resident memory T cells are defined by core transcriptional and functional signatures in lymphoid and mucosal sites. *Cell reports* **20**, 2921-2934 (2017).
- 36 Thome, J. J. *et al.* Longterm maintenance of human naive T cells through in situ homeostasis in lymphoid tissue sites. *Science immunology* **1**, doi:10.1126/sciimmunol.aah6506 (2016).
- 37 Kuss, I. *et al.* Recent thymic emigrants and subsets of naive and memory T cells in the circulation of patients with head and neck cancer. *Clinical immunology (Orlando, Fla.)* **116**, 27-36 (2005).
- 38 Reddy, S. MyTREC RealTime qPCR Assay Reagent Kit for Quantification of Human T-Cell Receptor Excision Circles (TRECs). *J Clin Epigenet.* **1**, 4 (2016).
- 39 Douek, D. C. *et al.* Evidence for increased T cell turnover and decreased thymic output in HIV infection. *J Immunol.* **167**, 6663-6668 (2001).



- 40 Talvensaaari, K. *et al.* A broad T-cell repertoire diversity and an efficient thymic function indicate a favorable long-term immune reconstitution after cord blood stem cell transplantation. *Blood* **99**, 1458-1464 (2002).
- 41 Flowers, C. R. *et al.* Antimicrobial prophylaxis and outpatient management of fever and neutropenia in adults treated for malignancy: American Society of Clinical Oncology clinical practice guideline. *Journal of clinical oncology : official journal of the American Society of Clinical Oncology* **31**, 794-810 (2013).
- 42 Matsuzaki, J. *et al.* Tumor-infiltrating NY-ESO-1-specific CD8+ T cells are negatively regulated by LAG-3 and PD-1 in human ovarian cancer. *Proceedings of the National Academy of Sciences of the United States of America* **107**, 7875-7880, doi:10.1073/pnas.1003345107 (2010).
- 43 Tsukamoto, H. *et al.* Combined Blockade of IL6 and PD-1/PD-L1 Signaling Abrogates Mutual Regulation of Their Immunosuppressive Effects in the Tumor Microenvironment. *Cancer research* **78**, 5011-5022, doi:10.1158/0008-5472.Can-18-0118 (2018).
- 44 Farren, M. R. *et al.* Systemic Immune Activity Predicts Overall Survival in Treatment-Naive Patients with Metastatic Pancreatic Cancer. *Clinical cancer research : an official journal of the American Association for Cancer Research* **22**, 2565-2574, doi:10.1158/1078-0432.Ccr-15-1732 (2016).
- 45 Mace, T. A. *et al.* IL-6 and PD-L1 antibody blockade combination therapy reduces tumour progression in murine models of pancreatic cancer. *Gut* **67**, 320-332, doi:10.1136/gutjnl-2016-311585 (2018).
- 46 Silva, E. M. *et al.* High systemic IL-6 is associated with worse prognosis in patients with non-small cell lung cancer. *PloS one* **12**, e0181125, doi:10.1371/journal.pone.0181125 (2017).

- 47 Weber, J. S. *et al.* Serum IL-6 and CRP as prognostic factors in melanoma patients receiving single agent and combination checkpoint inhibition. *Journal of Clinical Oncology* **37**, 100-100, doi:10.1200/JCO.2019.37.15\_suppl.100 (2019).
- 48 Sanmamed, M. F. *et al.* Changes in serum interleukin-8 (IL-8) levels reflect and predict response to anti-PD-1 treatment in melanoma and non-small-cell lung cancer patients. *Ann Oncol.* **28**, 1988-1995 (2017).
- 49 Lee, J. W. *et al.* Hepatocytes direct the formation of a pro-metastatic niche in the liver. *Nature* (2019).
- 50 van den Broek, T., Borghans, J. A. & van Wijk, F. The full spectrum of human naive T cells. *Nat Rev Immunol.*, 1 (2018).
- 51 Tio, M. *et al.* Anti-PD-1/PD-L1 immunotherapy in patients with solid organ transplant, HIV or hepatitis B/C infection. *Eur J Cancer.* **104**, 137-144 (2018).
- 52 Diao, B. *et al.* Reduction and functional exhaustion of T cells in patients with coronavirus disease 2019 (COVID-19). *Medrxiv* (2020).
- 53 Herold, T. *et al.* Level of IL-6 predicts respiratory failure in hospitalized symptomatic COVID-19 patients. *medRxiv* (2020).
- 54 Moon, C. Fighting COVID-19 exhausts T cells. *Nat Rev Immunol*, 1-1, doi:10.1038/s41577-020-0304-7 (2020).
- 55 Wang, Z., Yang, B., Li, Q., Wen, L. & Zhang, R. Clinical Features of 69 Cases with Coronavirus Disease 2019 in Wuhan, China. *Clinical infectious diseases : an official publication of the Infectious Diseases Society of America*, doi:10.1093/cid/ciaa272 (2020).
- 56 Zheng, G. X. *et al.* Massively parallel digital transcriptional profiling of single cells. *Nature communications* **8**, 14049 (2017).

Somasundaram *et al.*

*IL6/IL8 drive systemic immune dysfunction*

- 57 Li, N., Workman, C. J., Martin, S. M. & Vignali, D. A. Biochemical analysis of the regulatory T cell protein lymphocyte activation gene-3 (LAG-3; CD223). *J Immunol.* **173**, 6806-6812 (2004).

**FIGURE LEGENDS** **Figure 1: A LAG3-dominant IR module in peripheral CD8<sup>+</sup> T cells of cancer patients is associated with worse clinical outcomes and immunotherapeutic resistance.**

**a**, tSNE plots of unsupervised clustering of 26 HNSCC patients and 6 HD sample cells by cell type with *LAG3* (red) and *PDCD1* (blue) gene expression across cell types.

**b**, Representative flow cytometric plots of CD8<sup>+</sup> T cells from a healthy donor (black), CD8<sup>+</sup> T cells activated with anti-CD3 (0.5µg/mL) and anti-CD28 (1µg/mL) as a positive control (green), CD4<sup>+</sup> (blue) and CD8<sup>+</sup> (red) T cells from a patient with cancer and with low (<49%) total LAG3 on their CD8<sup>+</sup> T cells and from a patient with cancer and high (≥49%) total LAG3 on their CD8<sup>+</sup> T cells.

**c**, STED microscopy of a CD8<sup>+</sup> T cell from an HNSCC patient with low intracellular LAG3, and a CD8<sup>+</sup> T cell from an HNSCC patient with high intracellular LAG3. The markers used are CD8 (green), DAPI for nuclear staining (blue), LAG3 (red).

**d**, Surface, intracellular, and total LAG3 expression by flow cytometry in HNSCC (green; n=50) and HD PBL (blue; n=26) across T cell subsets including: CD8<sup>+</sup> T cells, CD4<sup>+</sup> T cells, and Tregs. A mean cutoff of greater than or equal to 49% LAG3<sup>TOT</sup> expression is represented by the black dashed line. Percent of patients above the mean cutoff is noted above the statistics. \*P <0.05, \*\*\*P <0.001, \*\*\*\*P < 0.0001, ns =not significant or P >0.05, Wilcoxon matched-pairs test.

**e**, Surface, intracellular, and total LAG3 expression by flow cytometry in NSCLC (orange; n=50) and metastatic melanoma PBL (pink; n=28) across T cell subsets including: CD8<sup>+</sup> T cells, CD4<sup>+</sup> T cells, and Tregs. LAG3 expression among each T cell subset is compared to its matched subset from HD PBL (**Fig 1d**). The percentage of patients above the mean cutoff of 49% (black dashed line) is noted as a percent above the statistical symbols. \*P <0.05, \*\*\*P <0.001, \*\*\*\*P < 0.0001, ns =not significant or P >0.05, Wilcoxon matched-pairs test.

**f**, Surface, intracellular, and total LAG3 expression by flow cytometry in TIL from patients. compared to tissue controls. Healthy donor lung tissue (n=11) compared to NSCLC TIL (n=12), and healthy donor tonsil (n=10) compared to HNSCC TIL (n=10). Wilcoxon matched-pairs test.

**g**, Spearman's correlation of matched PBL and TIL from high and low intracellular LAG3 patients (NSCLC, n=12; HNSCC, n=10; and metastatic melanoma n=5).

**h**, Surface, intracellular, and total LAG3 expression by flow cytometry of a total IR module consisting of LAG3, PD1, NRP1, CD39, TIGIT from only high intracellular LAG3 patients with NSCLC. Matched SPICE plot depicting the co-expression of IRs within these selected patients.

**i**, Comparison of LAG3<sup>IC</sup> expression from local vs. recurrent/metastatic (R/M) HNSCC patients (**Fig. 1d**). \*P <0.05, \*\*\*P <0.001, \*\*\*\*P < 0.0001, ns =not significant or P >0.05, Wilcoxon matched-pairs test.

**j**, Survival of patients with low (<49%) LAG3<sup>IC</sup> CD8<sup>+</sup> PBL (blue) versus survival of patients with high (≥49%) LAG3<sup>IC</sup> CD8<sup>+</sup> PBL from the R/M subgroup in **Fig 1i**. Hazard ratio (HR) of 9.96 (95% confidence interval: 1.176 to 177; p=0.02) after multivariate analysis including future treatments (systemic therapy versus local therapy alone), gender, tobacco use, and HPV status. \*P <0.05, \*\*\*P <0.001, \*\*\*\*P < 0.0001, ns =not significant or P >0.05, Wilcoxon matched-pairs test.

**k**, Comparison of LAG3<sup>IC</sup> expression in ki-67<sup>low</sup> CD8<sup>+</sup> T cells by flow cytometry from both responder (blue; n=18) and progressor (red; n=19) patients with metastatic melanoma and other skin cancers before checkpoint blockade and 12 weeks on checkpoint blockade at the time of their initial scans (4 cycles of therapy). Wilcoxon matched-pairs test.

**Figure 2: LAG3 is stored intracellularly in CD8+ T cells and traffics to the cell surface with rapid shedding via ADAM 10**

**a**, Surface LAG3 expression over time in CD8<sup>+</sup> T cells from healthy donors (n=6), from low LAG3 NSCLC patients (n=6), and high LAG3 NSCLC patients (n=6), during stimulation with anti-CD3 (0.5µg/mL) and matched 1:1 APCs. Wilcoxon matched-pairs test.

**b**, Spearman's correlation of soluble LAG3 in media culture and LAG3<sup>IC</sup> expression on CD8<sup>+</sup> T cells from patients during 24 hours of TCR stimulation with plate-bound anti-CD3 and anti-CD28 (n=14).

**c**, Spearman's correlation of matched ADAM10 and LAG3<sup>SUR</sup> expression on CD8<sup>+</sup> T cells from HNSCC patients (n=49).

**d**, Spearman's correlation of matched ADAM17 and LAG3<sup>SUR</sup> expression on CD8<sup>+</sup> T cells from HNSCC patients (n=49).

**e**, Soluble LAG3 in culture media of CD8<sup>+</sup> T cells from NSCLC patients (n=5) compared with CD8<sup>+</sup> T cells from healthy donors (n=5), with and without the presence of an ADAM10 inhibitor (10 $\mu$ M).

**f**, LAG3<sup>SUR</sup> expression by MFI on CD8<sup>+</sup> T cells from healthy donors (negative control; n=5), activated CD8<sup>+</sup> T cells (positive control; n=5), CD8<sup>+</sup> T cells from patients with low LAG3<sup>IC</sup> (n=5), and high LAG3<sup>IC</sup> (n=5) at increasing dose titrations of an ADAM10 inhibitor without the presence of TCR stimulation.

**Figure 3: Peripheral CD8<sup>+</sup> T cells with an elevated LAG3-dominant IR module have reduced function that can be partially rescued by anti-LAG3 or anti-PD1.**

**a**, Representative flow cytometric plots of TNF $\alpha$ , IFN  $\gamma$ , granzyme-B (GZMB), and IL2 expression in CD8<sup>+</sup> peripheral T cells from a healthy donor (blue), in CD8<sup>+</sup> PBL from a patient with NSCLC and low LAG3<sup>IC</sup> expression (pink), and in CD8<sup>+</sup> PBL from a patient with NSCLC and high LAG3<sup>IC</sup> expression (orange) after stimulation with PMA and ionomycin for 4-6 hours.

**b**, TNF $\alpha$ , IL2, IFN $\gamma$  and granzyme B production evaluated by flow cytometry after 4-6 hour PMA and ionomycin stimulation in bulk CD8<sup>+</sup> T cells with elevated LAG3<sup>IC</sup>/PD1<sup>IC</sup> expression from NSCLC patients (n=7) compared to CD8<sup>+</sup> T cells with low LAG3<sup>IC</sup>/PD1<sup>IC</sup> (n=26) and CD8<sup>+</sup> T cells from HD (n=10). Statistical significance determined by Wilcoxon signed-rank test (ns is P>0.05, \* is P $\leq$ 0.05, \*\* is P $\leq$ 0.01, \*\*\* is P $\leq$ 0.001, \*\*\*\* is P $\leq$ 0.0001).

**c**, Representative flow cytometric histogram plot of CTV-labelled proliferation in CD8<sup>+</sup> PBL from a patient with NSCLC and high LAG3<sup>IC</sup> expression (blue), and CD8<sup>+</sup> PBL from a patient with NSCLC and low LAG3<sup>IC</sup> expression (red).

**d**, Proliferation of CTV-labelled CD8<sup>+</sup> bulk PBL by flow cytometry from health donors (HD; n=8), patients with NSCLC and low LAG3<sup>IC</sup> (n=5), patients with metastatic melanoma and low LAG3<sup>IC</sup> (n=5), patients with NSCLC and high LAG3<sup>IC</sup> (n=7), or patients with metastatic melanoma and high LAG3<sup>IC</sup> (n=7). Proliferation assay was conducted over 96 hours with CD8<sup>+</sup> T cells incubated with matched APCs, and anti-CD3 (0.5µg/mL). (Statistical significance determined by Wilcoxon signed-rank test (ns is P>0.05, \* is P≤0.05, \*\* is P≤0.01, \*\*\* is P≤0.001, \*\*\*\* is P≤0.0001).

**e**, Cells from NSCLC PBL that contain the high LAG3<sup>IC</sup> CD8<sup>+</sup> T cell population were stimulated with anti-CD3 (0.5µg/mL) and matched 1:1 APCs at a 96-hour timepoint in the presence of anti-LAG3 and/or anti-PD1 and T cell division was assessed by CTV-labelling. Drug or isotype was titrated at concentrations of 10µg/mL, 5µg/mL, 2.5µg/mL, 1.25µg/mL, and 0µg/mL. \*P <0.05, \*\*\*P <0.001, \*\*\*\*P < 0.0001, ns is P>0.05, Wilcoxon matched-pairs test. Error bars, s.d.

**f**, Bulk CD4<sup>+</sup> T cells (n=5) and CD8<sup>+</sup> T cells (n=12) from NSCLC patients with high (n=7) and low LAG3<sup>IC</sup> (n=5) expression, were stimulated with anti-CD3 (0.5µg/mL) and matched 1:1 APCs at a 96 hour time point in the presence of anti-LAG3 (10µg/mL) and/or anti-PD1 (10µg/mL).

Correlations were performed with Spearman's nonlinear correlation. Mean values of proliferation noted in darker colors and individual sample proliferation noted in lighter colors. Statistical significance determined by Wilcoxon signed-rank test (ns is P>0.05, \* is P≤0.05, \*\* is P≤0.01, \*\*\* is P≤0.001, \*\*\*\* is P≤0.0001) comparing the change in proliferation after the addition of checkpoint blockade.

**g**, CD8<sup>+</sup> T cells from healthy donors (n=5), and patients with metastatic melanoma and high LAG3<sup>IC</sup> expression (n=7) were stimulated with anti-CD3 (0.5µg/mL) and matched 1:1 APCs at a 96-hour timepoint in the presence of anti-LAG3 (10µg/mL) and/or anti-PD1 (10µg/mL).

Correlations were performed with Spearman's nonlinear correlation. Mean values of proliferation noted in darker colors and individual sample proliferation noted in lighter colors. Statistical significance determined by Wilcoxon signed-rank test (ns is  $P > 0.05$ , \* is  $P \leq 0.05$ , \*\* is  $P \leq 0.01$ , \*\*\* is  $P \leq 0.001$ , \*\*\*\* is  $P \leq 0.0001$ ) comparing the change in proliferation after the addition of checkpoint blockade.

**Figure 4: LAG3-dominant IR module in peripheral, naïve CD8<sup>+</sup> T cells is driven by IL6 and IL8**

**a, b**, Naïve (CD45RA<sup>+</sup>CCR7<sup>+</sup>CD62L<sup>+</sup>) CD8<sup>+</sup> T Cells from healthy donors were incubated with IL2 and IL7 and plasma from patients with high LAG3<sup>IC</sup>/PD1<sup>IC</sup> on naïve CD8<sup>+</sup> T cells (n=7), plasma from patients with low LAG3<sup>IC</sup>/PD1<sup>IC</sup> on naïve CD8<sup>+</sup> T cells (n=3), and plasma from healthy donors (n=7) for 60 hours and analyzed for LAG3<sup>IC</sup> or PD1<sup>IC</sup> expression.) \*P < 0.05, \*\*\*P < 0.001, \*\*\*\*P < 0.0001, ns is P > 0.05, Wilcoxon matched-pairs test. Error bars, s.d.

**c**, Venn Diagram of all cytokines with any similar correlation between their plasma concentrations and LAG3<sup>IC</sup>/PD1<sup>IC</sup> expression on their naïve CD8<sup>+</sup> T cells (*blue*) followed by their ability to induce LAG3/PD1 expression in an *in vitro* incubation assay (*red*). Cytokines that are both correlated and can induce LAG<sup>IC</sup>/PD1<sup>IC</sup> expression are noted in purple. For full Spearman's correlation rho values between plasma concentrations of cytokines and total/intracellular LAG3 or PD1 expression on their naïve CD8<sup>+</sup> T cells see *Extended table 2*.

**d, e**, Naïve CD8<sup>+</sup> HD T cells incubated with plasma from High LAG3<sup>IC</sup>/PD1<sup>IC</sup> NSCLC patients in a similar manner to **Fig 4. a, b**. This plasma was known by multiplex to have elevated concentrations of all the cytokines of interest that correlated with LAG3<sup>IC</sup>/PD1<sup>IC</sup>. Incubation also included blockade of specific cytokines (anti-IL6 n=6; anti-IL8 n=7; anti-IL9 n=4; anti-IL10 n=3; anti-IL15 n=3; anti-IL22 n=4; anti-IL1 $\beta$  n=4; anti-IL21 n=5; anti-IL6/IL8 n=5) in an effort to rescue plasma-induced LAG3<sup>IC</sup>/PD1<sup>IC</sup> expression. Concentrations of each blocking antibody vary, and



the x-axis is noted as the percent of the reported EC<sub>50</sub> blocking dose. IL22 and IL1 $\beta$  concentration shown to be elevated by multiplex noted in *Extended Table 2* and correlated with LAG3<sup>IC</sup>/PD1<sup>IC</sup> but **not** noted to be able to induce LAG3<sup>IC</sup>/PD1<sup>IC</sup> in the *in vitro* induction assay, allowing blockade of IL22 and IL1 $\beta$  to serve as a negative control of rescue. Statistical significance determined by Wilcoxon signed-rank test (ns is P>0.05, \* is P $\le$ 0.05, \*\* is P $\le$ 0.01, \*\*\* is P $\le$ 0.001, \*\*\*\* is P $\le$ 0.0001). Error bars, s.d.

**f**, Spearman's correlation of IL6 and IL8 versus naïve (CD45RA<sup>+</sup>, CCR7<sup>+</sup>, CD62L<sup>+</sup>) CD8<sup>+</sup>, LAG3<sup>IC</sup> expression in NSCLC patients. Linear regression noted within data points with positive cytokine concentration.

**g, h**, Cells were assessed *ex vivo*. pSTAT1 and pSTAT3 expression evaluated by flow cytometry in naïve CD8<sup>+</sup> T cells from patients with elevated LAG3<sup>IC</sup>/PD1<sup>IC</sup> expression (n=5) compared to patients with low LAG3<sup>IC</sup>/PD1<sup>IC</sup> (n=16). Statistical significance determined by Wilcoxon signed-rank test (ns is P>0.05, \* is P $\le$ 0.05, \*\* is P $\le$ 0.01, \*\*\* is P $\le$ 0.001, \*\*\*\* is P $\le$ 0.0001).

**i**, Survival of advanced NSCLC patients on standard of care PD1 blockade therapy with IL6<sup>HI</sup> plasma (defined as  $\geq$  10ng/mL) compared with advanced NSCLC patients on therapy with IL6<sup>LO</sup> plasma (defined as <10ng/mL). The log-rank hazard ratio of 0.4056 (95% confidence interval: 0.1294 to 1.272; p=0.029) after multivariate analysis including only gender, tobacco use. \*P <0.05, \*\*\*P <0.001, \*\*\*\*P < 0.0001, ns =not significant or P >0.05.

**j**, Overall schema of cytokine inducing systemic immune dysfunction.

## METHODS

### Human T cell populations

*Patients and specimens*: Patients were seen in the Hillman Cancer Center (HCC) at the University of Pittsburgh Medical Center (UPMC) or the Sidney Kimmel Comprehensive Cancer Center

(SKCCC) and diagnosed with non-small cell lung carcinoma (NSCLC), head and neck squamous cell carcinoma (HNSCC), or metastatic melanoma. Patients were offered the option to donate blood or tissue as a part of our HCC research protocol (IRB# PRO16070383) or their corresponding SKCCC protocol. Patients then signed an IRB-approved informed consent and blood samples were obtained before initiation of treatment, but after pathologic diagnosis was established. Our fresh HNSCC cohort utilized for single-cell RNA sequencing (scRNAseq) included 11 tumor samples and 26 matched PBL and 6 HD PBL samples. The second cohort of fresh treatment-naïve HNSCC patients (n=49) was utilized for flow cytometric analysis and functional assays when sufficient cell yields allowed. The third cohort of banked PBL samples were thawed from HNSCC patients with both early-stage (n=24) and R/M (n=25) disease. Another cohort included fresh treatment-naïve NSCLC patients of all stages (n=50) utilized for flow cytometric analysis and functional assays when sufficient cell yields allowed. Our next cohort of banked PBL samples were thawed from NSCLC patients (n=33) along with matched HD smoker control PBL (n=10) utilized for flow cytometric analysis. Our fresh melanoma PBL cohort utilized 28 PBL samples for flow cytometric analysis and functional assays. An additional cohort of patients with advanced melanoma or other skin cancers provided PBL samples before checkpoint blockade and 12 weeks on checkpoint blockade (n=37) to the Sidney Kimmel Comprehensive Cancer Center at Johns Hopkins University.

*Isolation of patient blood and tumor samples:* Peripheral blood was drawn into both heparinized (flow cytometry and functional experiments) and EDTA tubes (for single-cell RNAseq experiments). PBL were isolated from peripheral blood by density gradient centrifugation using Ficoll-Hypaque (GE Healthcare Bioscience). Tumor samples were washed in RPMI containing antibiotics such as amphotericin B and penicillin-streptomycin for 30 minutes followed by mechanical and enzymatic digestion and further passage via a 100µm filter. Isolated PBL and TIL were then washed in RPMI media twice and utilized for downstream applications.

## **Antibodies, Flow Cytometry, and STED microscopy**

Single cell suspensions were stained with antibodies against CD45 (H130; BDbiosciences), CD45RA (H1100; Biolegend), CD4 (RPA-T4; Biolegend), CD8 (RPA-T8; Biolegend), surface LAG3 (1408; BMS), CD3 (SP34-2; BDbiosciences), ADAM10 (SHM14; Biolegend), PD1 (eBioJ105; eBioscience), ADAM17 (111633; R&D), pAKT (SDRNR; eBioscience), Ki67 (Ki67; Biolegend), total LAG3 (3DS223H; BMS), FoxP3 (PCH101, eBioscience), CCR7 (G043H7; Biolegend), CD62L (DREG56; Biolegend), CD103 (CD103; BDFisher), CD69 (FN50; Biolegend), CD95 (DX2; Biolegend), CD38 (HB-7; Biolegend), HLA-DR (L243; Biolegend), TNF $\alpha$  (MAb11; Biolegend), IFN $\gamma$  (4S.B3; Biolegend), IL2 (MQ1-17H12; eBiosciences), granzyme-B (GB11; Biolegend), STAT1 Phospho (Ser727; Biolegend), STAT3 Phospho (Tyr705, 13A3-1; Biolegend), Bcl2 (100; Biolegend), TIGIT (MBSA43; eBiosciences), TIM3 (F38-2E2; Biolegend), surface NRP1 (12C2; Biolegend), intracellular NRP1 (nrp1; abcam), CD39 (A1; Biolegend). Dead cells were discriminated by staining with Fixable Viability Dye (eBioscience) in PBS. Cytokine expression analysis was conducted after a 4-hour activation of cells with PMA (0.1ng/mL; Sigma), Ionomycin (0.5ng/mL; Sigma), and Golgistop (Protein Transport Inhibitor; BDbioscience). Intracellular staining of cytokines and other proteins and transcription factors were conducted after fixation and permeabilization (eBioscience 88-8824-00) for 1 hour followed by two wash steps with permeabilization buffer (eBioscience). Surface and intracellular staining were conducted for 30 minutes at 4°C. Cells were sorted on MoFlo Astrios (Beckman Coulter). Flow cytometry experiments were performed using a Fortessa II (BD Bioscience). Flow cytometric data analyses were performed on FlowJo (Tree Star). Images were acquired with a Leica STED microscope after cell staining and fixation.

## **Single-Cell RNA sequencing**

*Generation of single-cell RNAseq libraries:* Libraries were prepared as previously described (Cillo et al, Immunity 2020). Briefly, live CD45<sup>+</sup> cells (i.e. all immune cells) were sorted from PBL. Single-cell libraries were generated utilizing the chromium single-cell 3' Reagent from V2 chemistry, as previously described<sup>56</sup>. Briefly, sorted cells were resuspended in PBS (0.04% BSA; Sigma) and then loaded into the 10X Controller for droplet generation, targeting recovery of 2,000 cells per sample. Cells were then lysed and reverse transcription was performed within the droplets and cDNA was isolated and amplified in bulk with 12 cycles of PCR. Amplified libraries were then size-selected utilizing SPRIselect beads, and adapters were ligated followed by sample indices. After another round of SPRIselect purification, a KAPA DNA Quantification PCR determined the concentration of libraries.

*Sequencing of single-cell libraries:* Libraries were diluted to 2nM and pooled for sequencing by NextSeq500/550 high-output v2 kits (at the Health Sciences Sequencing at the UPMC Children's Hospital of Pittsburgh) for 150 cycles (parameters: Read 1: 26 cycles; i7 index: 8 cycles, Read 2: 98 cycles).

*Demultiplexing, alignment, and generation of gene/barcode matrices:* Raw sequence data were processed via CellRanger (10X genomics) and aligned to GRCh38 to generate feature barcode matrices. Cell barcodes with fewer than 3 UMI counts in 1% of cells and detection of 1% of cells were removed.

*Alignment of data:* Feature barcode matrices were read into Seurat v3, and data were integrated using a reciprocal principal component analysis (PCA) (T Stuart and A Butler et al, Cell 2019). Briefly, cells from each sample were log-normalized for library size, and highly variable features were identified from each sample. Features commonly expressed across samples were selected to integrate data. Next, data from each sample was scaled and PCA was performed based on

highly variable genes. Reciprocal PCA was then performed using one sample each from a healthy donor, and HPV– HNSCC patient, and an HPV+ HNSCC patient to form an integrated dataset.

*Visualization of all cells and identification of cell types:* After creating an integrated dataset, we next utilized uniform manifold approximation and projection (UMAP; Becht E et al, Nature Biotech 2018) to visualize cells from all samples in a low-dimensional embedding. Cell types were identified as described previously (Cillo et al, Immunity 2020).

### **Multivariate survival analysis of HNSCC cohort**

Overall survival was defined as the time from baseline PBL sample acquisition until death from any cause. Between group-comparisons were completed via a log-rank test and multivariate analysis that included: stage, treatment course, race, gender, age group, tobacco use, alcohol use, histology, disease site (larynx, hypopharynx, oropharynx), and p16 status. The Kaplan-Meier method was utilized to calculate survival and their 95% confidence intervals.

### **TREC qPCR assay**

Samples and controls from fresh PBL were sorted by CD45RA<sup>+</sup>CCR7<sup>+</sup>CD62L<sup>+</sup> cells from high LAG3<sup>IC</sup> CD8<sup>+</sup> T cell patients, low LAG3<sup>IC</sup> CD8<sup>+</sup> T cell patients, matched CD4<sup>+</sup> T cells, HD CD8<sup>+</sup> T cells, and effector cells from matched patients and donors. The patients included five healthy donors, three NSCLC patients, three metastatic melanoma patients, and four HNSCC patients with high LAG3 on their CD8<sup>+</sup> T cells along with three NSCLC, three metastatic melanoma, and four HNSCC patients with low LAG3 on their CD8<sup>+</sup> T cells. These samples were from our fresh sample accrual. Genomic DNA was extracted from cell pellets and then resuspended in nuclease-free water. Real-time qPCR settings were utilized per the MyTRECkit (genenplus) and run for 40 cycles with ROX master mix along with the built-in beta-actin and sample controls<sup>38</sup>. Samples were run in triplicate and data were analyzed after normalization of measurements.

## ATACseq

All libraries were sequenced with 75 bp paired-end reads. For each sample, we trimmed the nextera adapter sequences using cutadapt, and the resulting sequences were aligned to hg38 reference genome using bwa-mem. We filtered reads mapping to mitochondrial DNA from the analysis together with low-quality reads and reads in ENCODE blacklist regions. The model-based analysis of MACS2 was used to identify the peak regions with options “ -q 0.01 -no-model -g hs”, and peak annotation was performed using HOMER.

## Functional Assays

*Proliferation/stimulation assays:* Bulk and naïve PBL were sorted on a MoFlo Astrios (Beckman Coulter) for CD8<sup>+</sup> T cells, CD4<sup>+</sup> T cells, and antigen-presenting cells (APCs). Autologous stimulation assays were performed with T cells, APCs, anti-CD3 (eBioscience, 0.5 µg/ml), and checkpoint blocking antibodies (anti-PD1 and anti-LAG3, 10ug/mL). T cells were analyzed for proliferation at day 5 via Cell trace dye (eBioscience) and inhibitory receptor expression (LAG3 and PD1) on a Fortessa II (BD Bioscience) and data analyses were performed via FlowJo (Tree Star).

*Soluble Cytokine Analysis with Luminex:* Plasma samples from patient cohorts were isolated by centrifugation and analyzed by ProcartaPlex 45 cytokine immunoassay (Thermo Fisher).

*Inhibitory receptor induction assay via cytokine/plasma:* LAG3<sup>IC</sup> and PD1<sup>IC</sup> expression were analyzed on bulk and naive T cells after incubation with various cytokines and patient plasma samples. Bulk and naïve CD8<sup>+</sup> T cells and CD4<sup>+</sup> T cells were sorted and incubated with low-dose IL2 (1000IU/mL), and low dose IL7 (1ng/mL) and no TCR stimulation. These assays included incubation with 45 individual cytokines at their corresponding EC<sub>50</sub> concentration (R&D Systems) as well as plasma samples from our fresh patient PBL cohorts above with both low and high LAG3 CD8<sup>+</sup> T cell subsets. Further assays included incubation with patient plasma and cytokine

blockade including anti-IL6, anti-IL8, anti-IL22, anti-IL1b, anti-IL9, anti-IL10, anti-IL15, anti-IL21 at their corresponding EC<sub>50</sub> concentration (Abcam). Incubation assays were conducted for 60 hours and analyzed by flow cytometry.

### **LAG3 trafficking/shedding analysis**

*In vitro ADAM10 assays:* Bulk and sorted peripheral CD8<sup>+</sup> and CD4<sup>+</sup> T cells were incubated in low dose IL2 and with and without varying concentrations of the ADAM10 and/or ADAM17 inhibitors: GI245023X (Tocris Biosciences), GW280264X (Aobious) inhibitors after 24 to 48 hours. The supernatant was collected and assayed for sLAG3 by ELISA in isolated cell types. Soluble LAG3 was also evaluated by ELISA in bulk and sorted peripheral CD8<sup>+</sup> and CD4<sup>+</sup> T cells *ex vivo* utilizing a sLAG3 ELISA kit (R&D Systems). A 96 well plate was coated with a capture antibody for 24 hours followed by sample and standard incubation. The samples were then washed with the corresponding primary, secondary HRP, and substrate solutions were added accordingly with wash steps in between. Absorbance was measured by an Epoch microplate spectrophotometer (Biotek Instruments). sLAG3 concentration was calculated using a purified sLAG3 standard curve, as previously described.<sup>57</sup>

### **Statistical methods**

Statistical analyses were conducted using Prism Version 7 (GraphPad). Comparisons of independent samples were conducted using Wilcoxon signed-rank tests (**Fig. 1c-g, 2b, c, 3a-f, 4a-h, Extended Fig. 1e, Extended Fig. 2a-i, 4a, b, e, f**). Analysis of nonlinear correlations were conducted utilizing a Spearman's correlation coefficient (**Fig. 3c, 4c, d; Extended Fig. 2a-g, Extended Table 2**). No correlation designated as "nc". Event-free survival was calculated with the Log-Rank (Mantel-Cox) test applied to Kaplan-Meier survival function estimates to determine statistical significance (**Fig. 1e**). "n" represents the number of human subjects used in an experiment, with the number of individual experiments listed in the legend. Samples are shown

*Somasundaram et al.*

*IL6/IL8 drive systemic immune dysfunction*

with the mean with or without error bars indicating standard error of the mean (s.e.m) \*P <0.05,

\*\*\*P <0.001, \*\*\*\*P< 0.0001, ns is P>0.05, Wilcoxon matched-pairs test.



**Figure 1: A LAG3-dominant IR module in peripheral CD8<sup>+</sup> T cells of cancer patients is associated with worse clinical outcomes and immunotherapeutic resistance.**

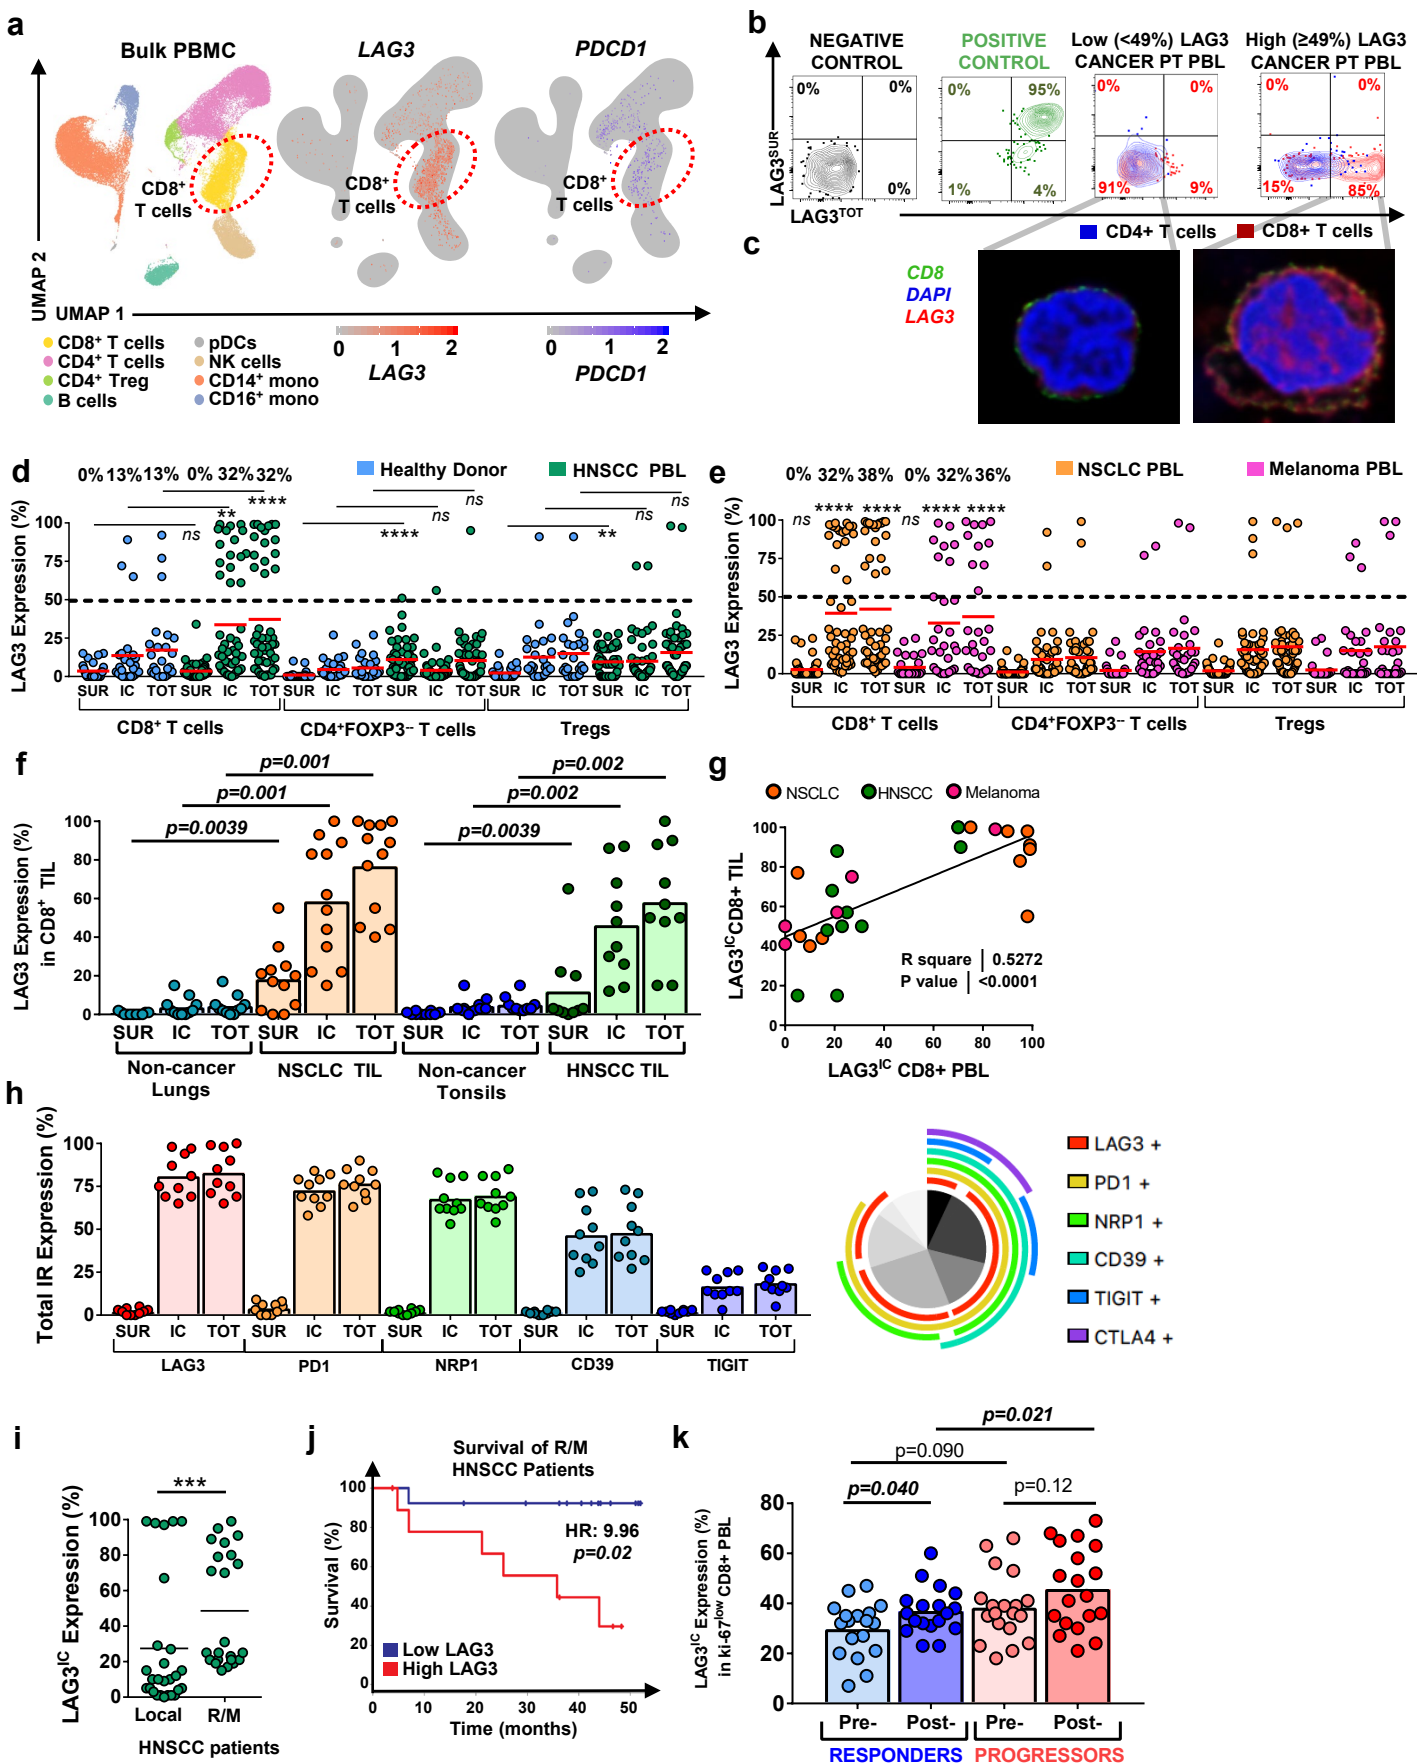

**Figure 2: LAG3 is stored intracellularly in CD8+ T cells and traffics to the cell surface with rapid shedding via ADAM 10**

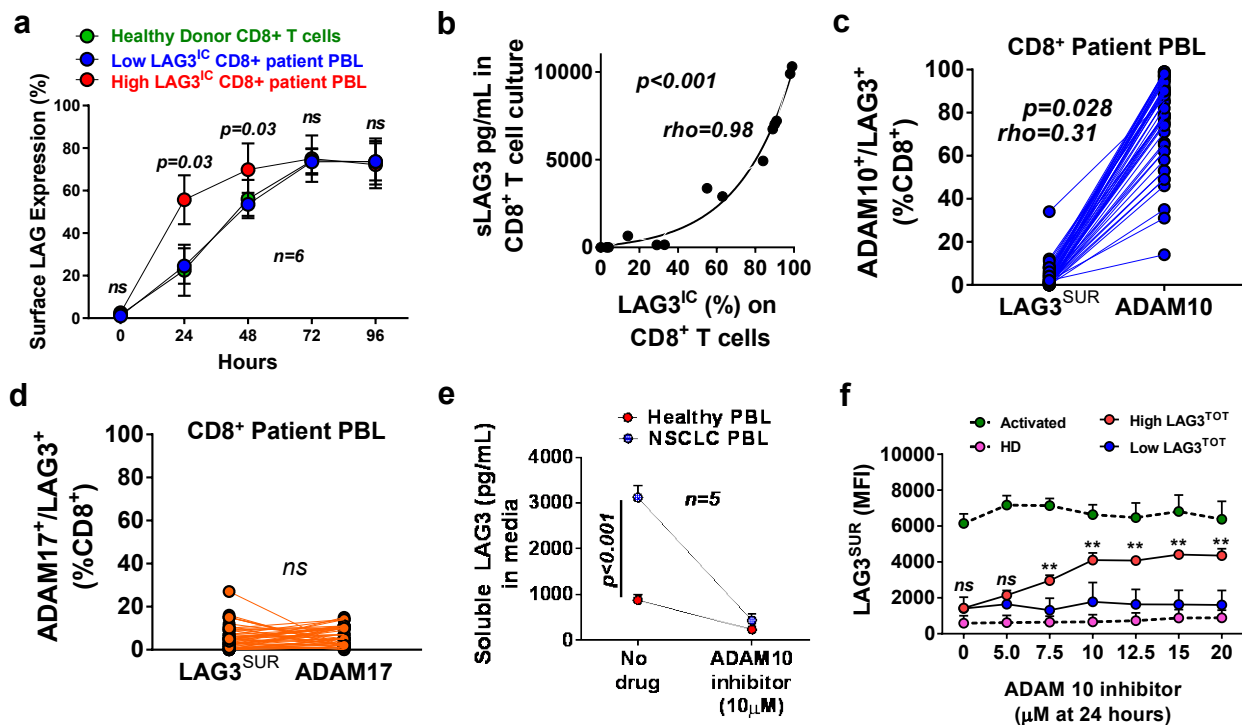

**Figure 3: Peripheral CD8<sup>+</sup> T cells with an elevated LAG3-led IR module have reduced function that can be partially rescued by anti-LAG3 or anti-PD1.**

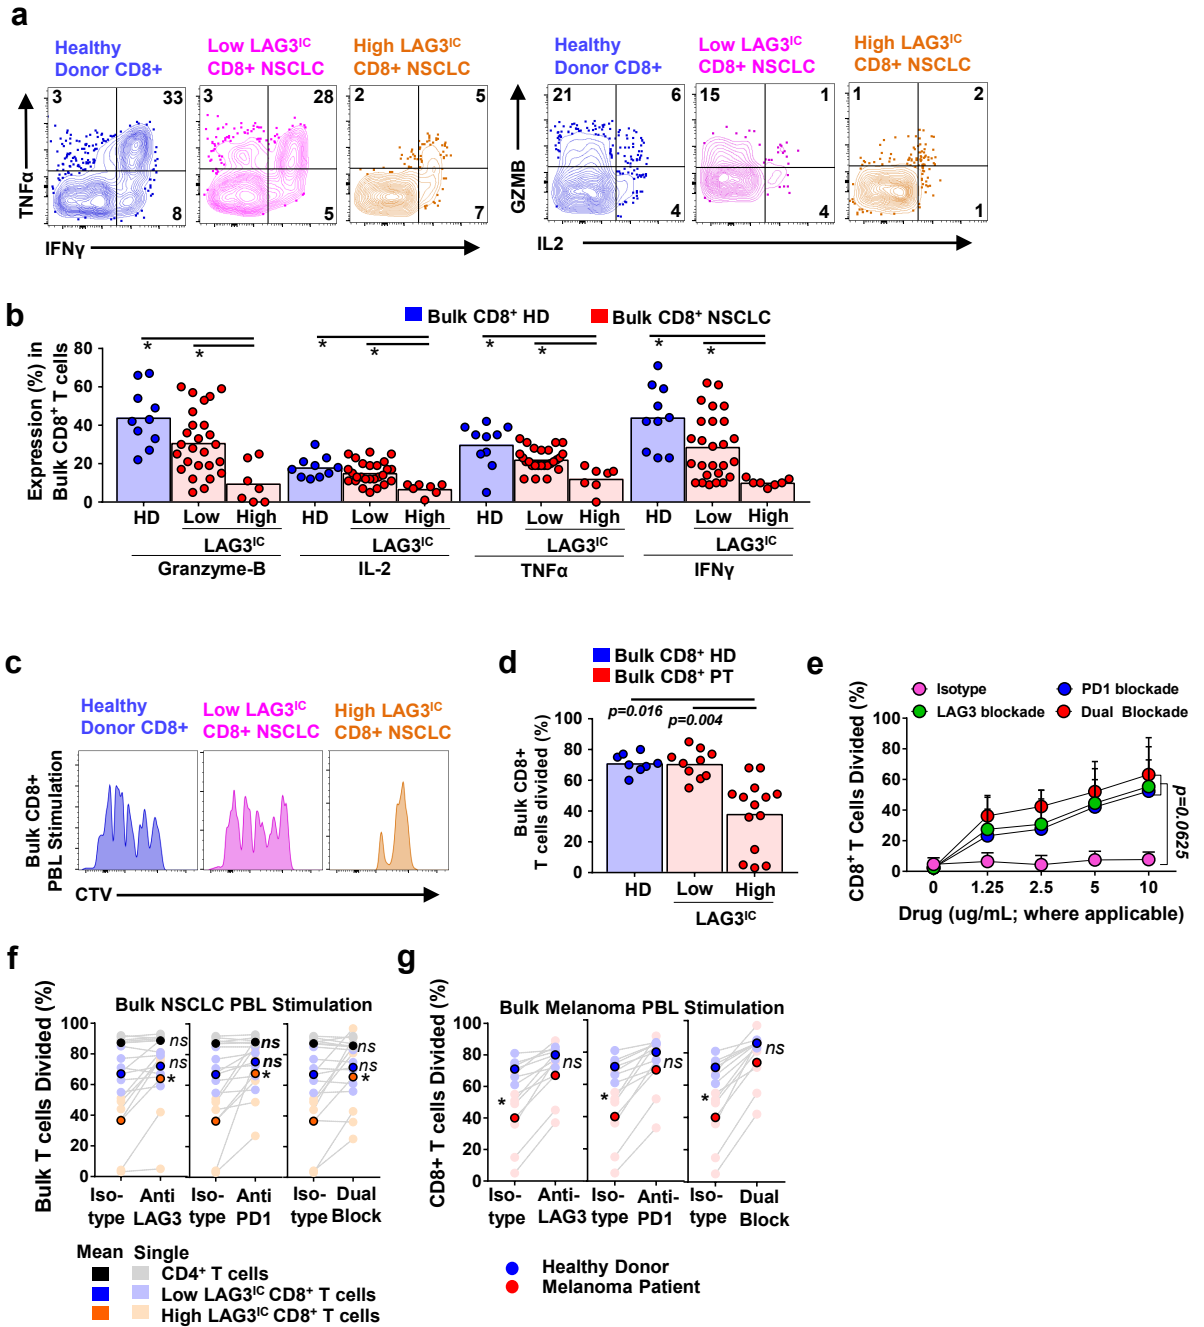

**Figure 4: LAG3-led IR module in peripheral, naïve CD8<sup>+</sup> T cells is driven by IL6 and IL8**

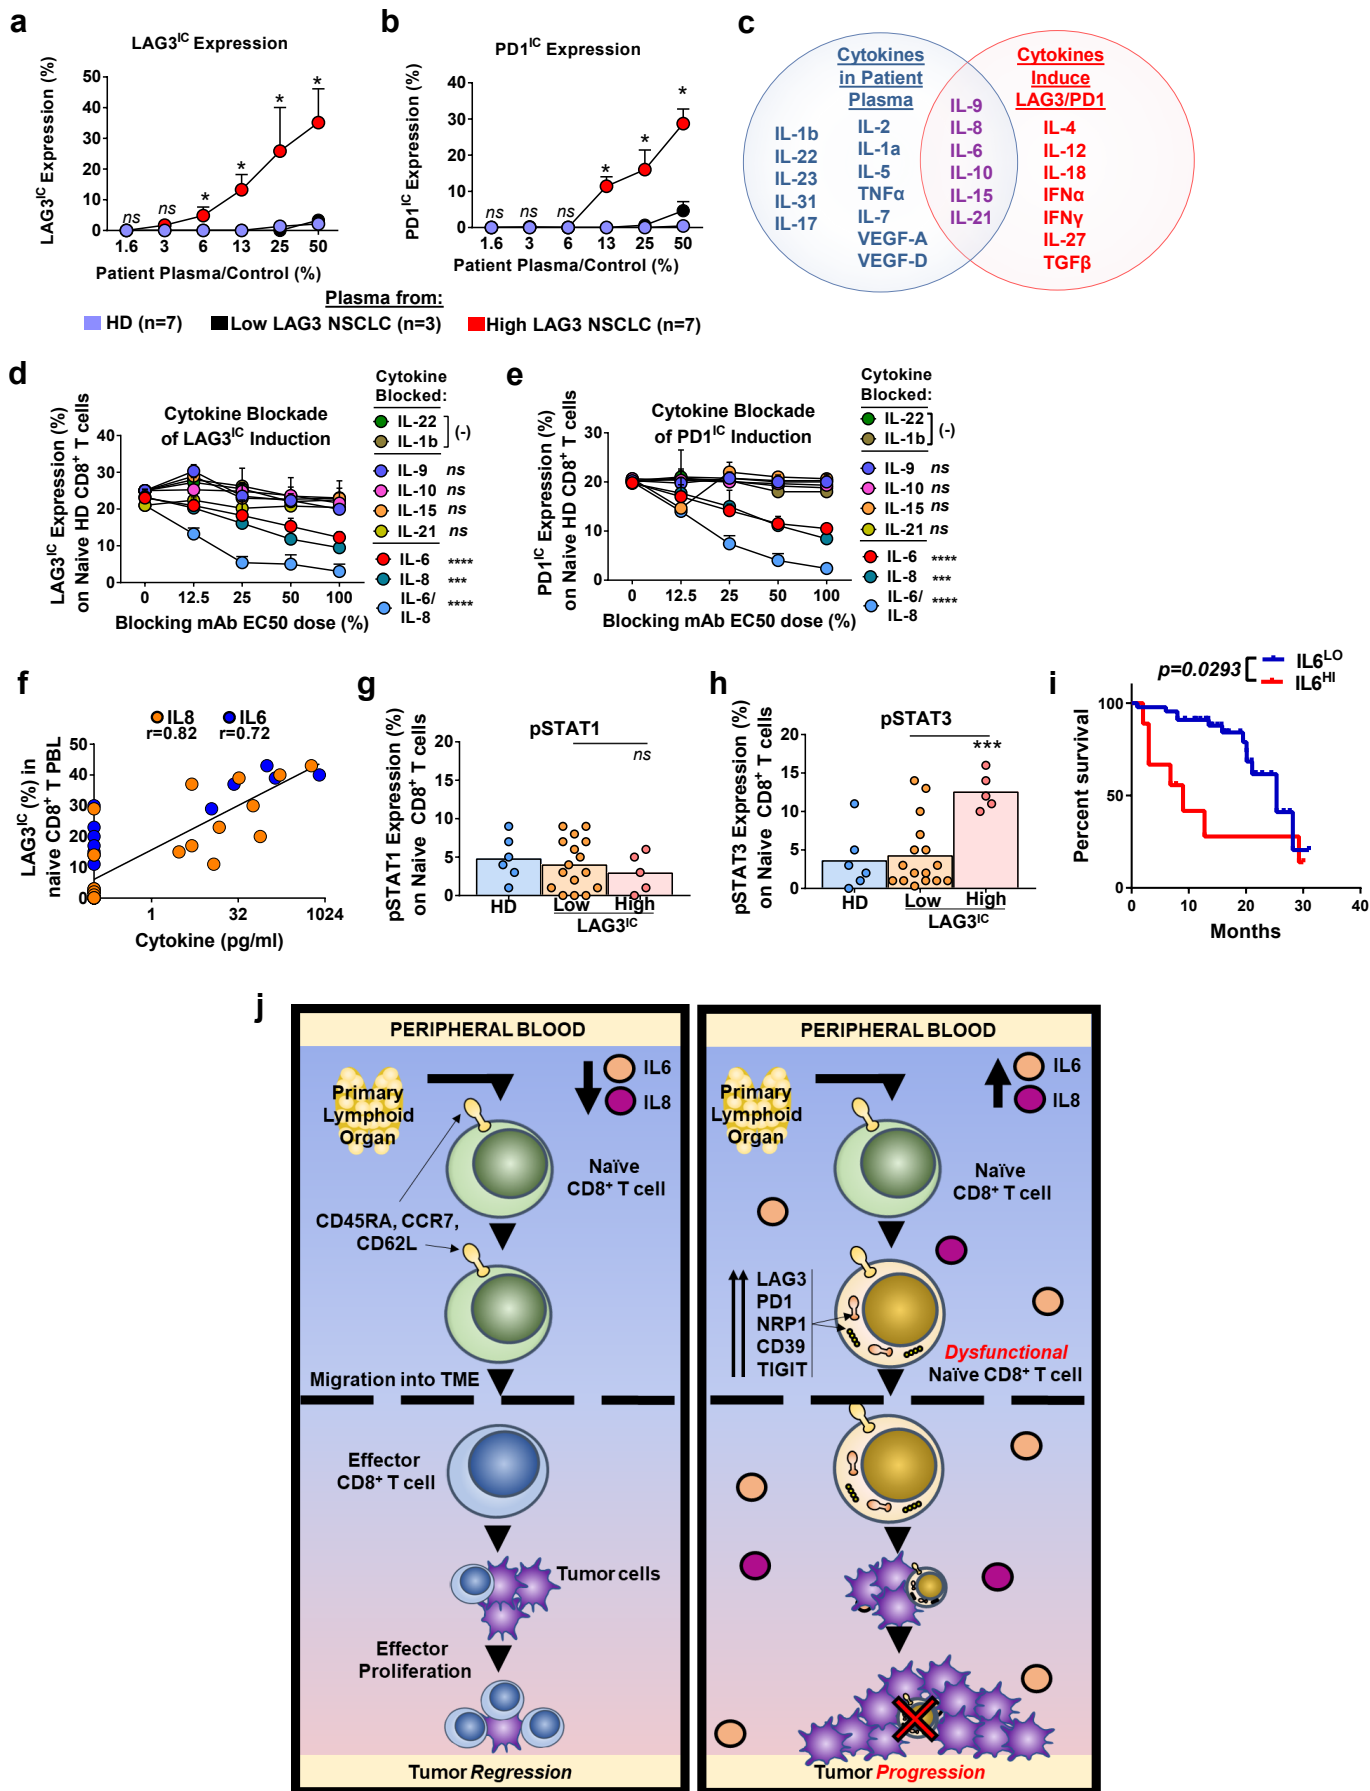

Source: https://biorxiv.org/content/10.1101/2020.05.06.081471v1.full.pdf
